# Supplementary material for: Urban surface water flood modelling – a comprehensive review of current models and future challenges
Source: Copernicus journal article supplement (doi:10.5194/hess-25-2843-2021), 2021-05-27
Supplement: Supplementary file [file hess-25-2843-2021-supplement.pdf]

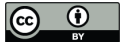

*Supplement of*

## **Urban surface water flood modelling – a comprehensive review of current models and future challenges**

**Kaihua Guo et al.**

*Correspondence to:* Mingfu Guan (mfguan@hku.hk)

The copyright of individual parts of the supplement might differ from the article licence.

**Table S1. Literature pool**

| No. | Author               | Journal/ institute                               | Year | Title                                                                                                                   | Study area                         |
|-----|----------------------|--------------------------------------------------|------|-------------------------------------------------------------------------------------------------------------------------|------------------------------------|
| 1   | Djordjevic S. et.al  | Water Science and Technology                     | 1999 | An approach to simulation of dual drainage                                                                              | Drainage network models            |
| 2   | Mark O. et.al        | Journal of Hydrology                             | 2004 | Potential and limitations of 1D modelling of urban flooding                                                             |                                    |
| 3   | Schmitt T. G. et.al  | Journal of Hydrology.                            | 2004 | Analysis and modelling of flooding in urban drainage systems                                                            |                                    |
| 4   | Djordjevic S. et.al  | Water Science & Technology                       | 2005 | SIPSON-simulation of interaction between pipe flow and surface overland flow in networks                                |                                    |
| 5   | Rossman L.A.         | US Environmental Protection Agency               | 2010 | Storm water management model user's manual, version 5.                                                                  |                                    |
| 6   | Bradbrook K.F. et.al | International Journal of River Basin Management  | 2004 | Two dimensional diffusion wave modelling of flood inundation using a simplified channel representation.                 | Simplified 2D shallow water models |
| 7   | Rao P                | Environmental Modelling and Software             | 2005 | A parallel RMA2 model for simulating large-scale free surface flows                                                     |                                    |
| 8   | Yu D. et.al          | Hydrological Processes: An International Journal | 2006 | Urban fluvial flood modelling using a two-dimensional diffusion-wave treatment, part 1: mesh resolution effects         |                                    |
| 9   | Hunter N.M. et.al    | Geomorphology                                    | 2007 | Simple spatially-distributed models for predicting flood inundation: A review                                           |                                    |
| 10  | Yu D                 | Environmental Modelling and Software             | 2010 | Parallelization of a two-dimensional flood inundation model based on domain decomposition                               |                                    |
| 11  | Bates P. et.al       | Journal of Hydrology                             | 2010 | A simple inertial formulation of the shallow water equations for efficient two-dimensional flood inundation modelling   |                                    |
| 12  | Chen A.S. et.al      | Journal of Hydrology                             | 2012 | A coarse-grid approach to representing building blockage effects in 2D urban flood modelling                            |                                    |
| 13  | Almeida G. et.al     | Water Resources Research                         | 2013 | Applicability of the local inertial approximation of the shallow water equations to flood modeling                      |                                    |
| 14  | Zhang H              | Newcastle University                             | 2014 | Urban flood simulation by coupling a hydrodynamic model with a hydrological model.                                      |                                    |
| 15  | Henonin J. et.al     | Urban Water Journal                              | 2015 | Citywide multi-grid urban flood modelling: The July 2012 flood in Beijing                                               |                                    |
| 16  | Leandro J. et.al     | Water Science and Technology                     | 2016 | A methodology for linking 2D overland flow models with the sewer network model SWMM 5.1 based on dynamic link libraries |                                    |
| 17  | Sanders B. et.al     | Advances in Water Resources                      | 2019 | PRIMo: Parallel raster inundation model                                                                                 |                                    |

|    |                    |                                        |      |                                                                                                                                                                        |                                                                                          |
|----|--------------------|----------------------------------------|------|------------------------------------------------------------------------------------------------------------------------------------------------------------------------|------------------------------------------------------------------------------------------|
| 18 | Huang H. et.al     | Hydrology Research                     | 2019 | An urban pluvial flood simulation model based on diffusive wave approximation of shallow water equations                                                               |                                                                                          |
| 19 | Audusse E. et.al   | SIAM Journal on Scientific Computing   | 2004 | A fast and stable well-balanced scheme with hydrostatic reconstruction for shallow water flows.                                                                        |                                                                                          |
| 20 | Liang Q. et.al     | Advances in water resources            | 2009 | Numerical resolution of well-balanced shallow water equations with complex source terms.                                                                               |                                                                                          |
| 21 | Toro E.F.          | Springer Science & Business Media      | 2013 | Riemann solvers and numerical methods for fluid dynamics: a practical introduction.                                                                                    |                                                                                          |
| 22 | Kim B. et.al       | Journal of Hydrology                   | 2015 | Urban flood modeling with porous shallow-water equations: A case study of model errors in the presence of anisotropic porosity                                         |                                                                                          |
| 23 | Guinot V. et.al    | Advances in Water Resources            | 2017 | Dual integral porosity shallow water model for urban flood modelling.                                                                                                  |                                                                                          |
| 24 | Bruwier M. et.al   | Journal of Hydrology                   | 2017 | Shallow-water models with anisotropic porosity and merging for flood modelling on Cartesian grids                                                                      |                                                                                          |
| 25 | Glenis V. et.al    | Environmental Modelling and Software   | 2018 | A fully hydrodynamic urban flood modelling system representing buildings, green space and interventions                                                                | Full 2D shallow water models                                                             |
| 26 | Ferrari A. et.al   | Advances in water resources            | 2019 | Flood inundation modeling in urbanized areas: A mesh-independent porosity approach with anisotropic friction.                                                          |                                                                                          |
| 27 | Xia X. et.al       | Advances in Water Resources            | 2019 | A full-scale fluvial flood modelling framework based on a high-performance integrated hydrodynamic modelling system (HiPIMS).                                          |                                                                                          |
| 28 | Seyoum S. D. et.al | Journal of Hydraulic Engineering       | 2011 | Coupled 1D and Noninertia 2D Flood Inundation Model for Simulation of Urban Flooding                                                                                   |                                                                                          |
| 29 | Bazin P. H. et.al  | Journal of Hydraulic Engineering       | 2014 | Modeling flow exchanges between a street and an underground drainage pipe during urban floods                                                                          |                                                                                          |
| 30 | Chen Y. et.al      | Environmental Research                 | 2015 | Urban flood risk warning under rapid urbanization                                                                                                                      | Drainage network coupled to urban surface model (Overlap with the above does not repeat) |
| 31 | Leandro J. et.al   | Water Science and Technology           | 2016 | A methodology for linking 2D overland flow models with the sewer network model SWMM 5.1 based on dynamic link libraries                                                |                                                                                          |
| 32 | Martins R. et.al   | Journal of Hydroinformatics            | 2017 | A comparison of three dual drainage models: Shallow water vs local inertial vs diffusive wave                                                                          |                                                                                          |
| 33 | Li Q. et.al        | Advances in Water Resources, 2020,137. | 2020 | A novel 1D-2D coupled model for hydrodynamic simulation of flows in drainage networks                                                                                  |                                                                                          |
| 34 | Yanqing L. et.al   | Journal of Hydrology                   | 2007 | Coupling of hydrologic and hydraulic models for the Illinois River Basin                                                                                               | Hydrological coupled to hydrodynamic urban flood model                                   |
| 35 | Bonnifait L. et.al | Advances in Water Resources            | 2009 | Distributed hydrologic and hydraulic modelling with radar rainfall input: Reconstruction of the 8–9 September 2002 catastrophic flood event in the Gard region, France |                                                                                          |

|    |                   |                                           |      |                                                                                                                                               |                            |
|----|-------------------|-------------------------------------------|------|-----------------------------------------------------------------------------------------------------------------------------------------------|----------------------------|
| 36 | Mejia A.I. et.al  | Journal of Hydrology                      | 2011 | Evaluating the effects of parameterized cross section shapes and simplified routing with a coupled distributed hydrologic and hydraulic model |                            |
| 37 | Kim J. et.al      | Advances in Water Resources               | 2012 | Coupled modeling of hydrologic and hydrodynamic processes including overland and channel flow                                                 |                            |
| 38 | Zhanyan L. et.al  | Hydrology Research                        | 2019 | A coupled hydrological and hydrodynamic model for flood simulation                                                                            |                            |
| 39 | Rajib A. et.al    | Journal of Hydrology                      | 2020 | Towards a large-scale locally relevant flood inundation modeling framework using SWAT and LISFLOOD-FP                                         |                            |
| 40 | Nardi, F. et.al   | Irrigation and Drainage                   | 2013 | Comparing a large-scale DEM-based floodplain delineation algorithm with standard flood maps: The Tiber River Basin case study                 | Hydrogeomorphic approaches |
| 41 | Nardi, F. et.al   | River Research and Applications           | 2018 | Hydrologic scaling for hydrogeomorphic floodplain mapping: Insights into human-induced floodplain disconnectivity                             |                            |
| 42 | Di B, G. et.al    | Natural Hazards and Earth System Sciences | 2020 | Brief communication: Comparing hydrological and hydrogeomorphic paradigms for global flood hazard mapping                                     |                            |
| 43 | Dottori F. et.al  | Physics and Chemistry of the Earth        | 2011 | Developments of a flood inundation model based on the cellular automata approach: testing different methods to improve model performance.     |                            |
| 44 | Ghimire B. et.al  | Journal of Hydroinformatics               | 2013 | Formulation of a fast 2D urban pluvial flood model using a cellular automata approach.                                                        | Other methods              |
| 45 | Guidolin M. et.al | Environmental Modelling and Software      | 2016 | A weighted cellular automata 2D inundation model for rapid flood analysis.                                                                    |                            |
| 46 | Yaseen ZM. et.al  | Journal of Hydrology                      | 2015 | Artificial intelligence based models for stream-flow forecasting: 2000-2015.                                                                  |                            |
| 47 | Wolfs V. et.al    | Environmental Modelling & Software        | 2014 | Development of discharge-stage curves affected by hysteresis using time varying models, model trees and neural networks.                      |                            |
| 48 | Bermudez M. et.al | Water Resources Management                | 2018 | Development and Comparison of Two Fast Surrogate Models for Urban Pluvial Flood Simulations.                                                  |                            |
